# Supplementary material
Source: publisher site journal article supplement (https://www.dovepress.com/article/459884)
Supplement: Supplementary file 1 [file get_supplementary_file.php]

**Table S1 Subgroup analyses on PH**

|                    | EVT(n=236)      | IVT+EVT(n=148)   | <i>p</i> for interaction |
|--------------------|-----------------|------------------|--------------------------|
|                    | OR(95%CI)       | OR(95%CI)        |                          |
| <b>TG</b>          | 2.45(1.00-6.31) | 2.13(0.65-7.87)  | 0.998                    |
| <b>TC</b>          | 1.47(0.58-3.87) | 2.60(0.72-9.96)  | 0.388                    |
| <b>LDL-C</b>       | 1.56(0.62-4.13) | 1.07(0.27-4.17)  | 0.775                    |
| <b>HDL-C</b>       | 0.51(0.20-1.25) | 0.43(0.06-1.95)  | 0.877                    |
| <b>Non-HDL-C</b>   | 2.90(1.12-8.33) | 2.33(0.71-8.17)  | 0.957                    |
| <b>RC</b>          | 2.62(1.07-6.79) | 2.45(0.77-8.95)  | 0.929                    |
| <b>TG/HDL-C</b>    | 2.40(1.00-6.00) | 2.31(0.70-9.13)  | 0.911                    |
| <b>TC/HDL-C</b>    | 3.27(1.32-8.78) | 2.76(0.81-11.10) | 0.966                    |
| <b>LDL-C/HDL-C</b> | 2.59(1.07-6.75) | 1.66(0.47-6.38)  | 0.722                    |
| <b>RC/HDL-C</b>    | 2.69(1.10-6.93) | 1.62(0.50-5.86)  | 0.669                    |

**Note:** ORs are adjusted for history of atrial fibrillation and fasting plasma glucose.

**Abbreviations:** OR denotes odds ratio; CI denotes confidence interval; EVT denotes endovascular treatment; IVT denotes intravenous thrombolysis. TG denotes triglyceride; TC denotes total cholesterol; HDL-C denotes high density lipoprotein cholesterol; LDL-C denotes low density lipoprotein cholesterol; Non-HDL-C denotes non-high-density lipoprotein cholesterol; RC denotes remnant cholesterol.

Figure S1 Correlation between lipid parameters.

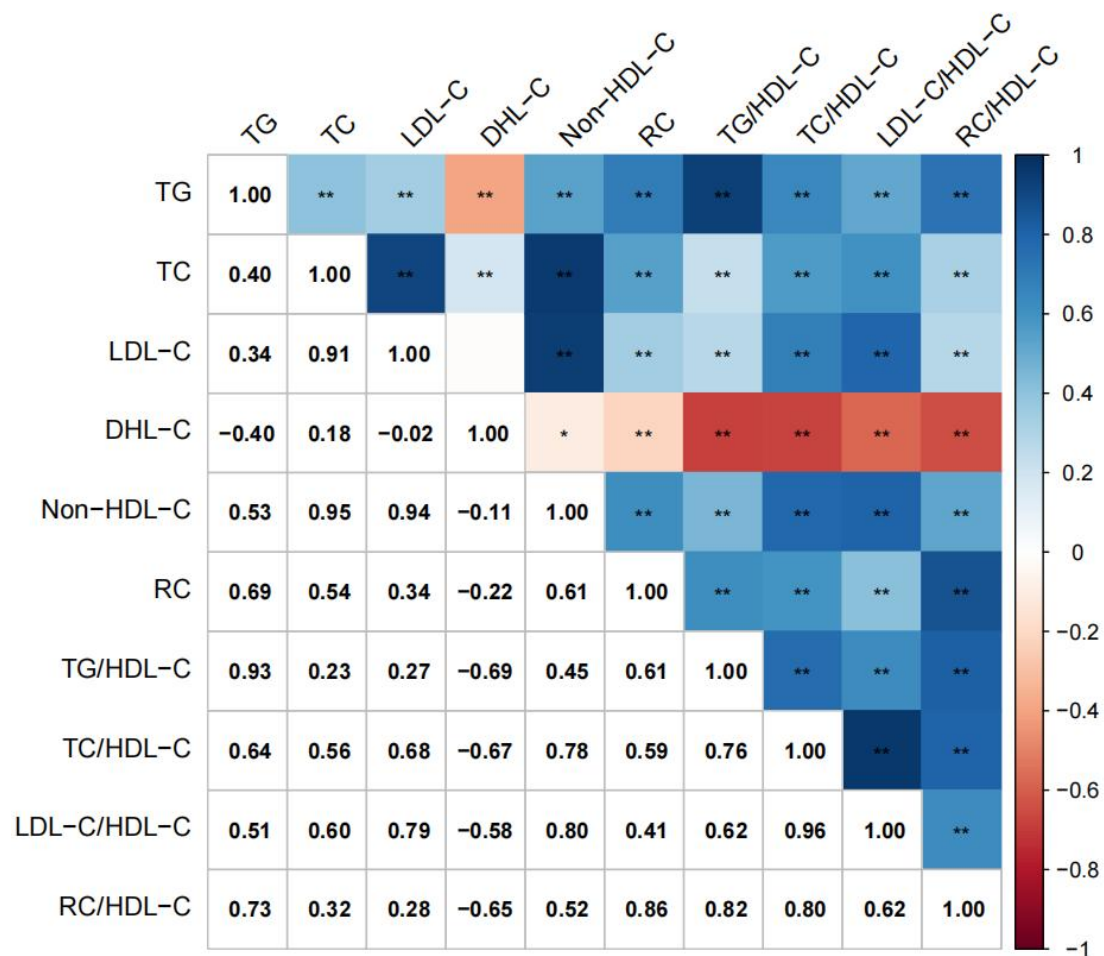

**Note:** \*  $p < 0.05$ ; \*\*  $p < 0.01$ ; blank for  $p > 0.05$ .

**Abbreviations:** TG, triglyceride; TC, total cholesterol; HDL-C, high density lipoprotein cholesterol; LDL-C, low density lipoprotein cholesterol; Non-HDL-C, non-high-density lipoprotein cholesterol; RC, remnant cholesterol.
